# Supplementary material
Source: PubMed Central journal article supplement (PMC3477201)

## Supplemental Figure 1

**Article Title:** Cytochrome P450-mediated oxidative metabolism of abused synthetic cannabinoids found in “K2/Spice”: Identification of novel cannabinoid receptor ligands

**Authors:** Krishna C. Chimalakonda, Kathryn A. Seely, Stacie M. Bratton, Lisa K. Brents, Cindy L. Moran, Gregory W. Endres, Laura P. James, Paul F. Hollenberg, Paul L. Prather, Anna Radominska-Pandya, Jeffery H. Moran

**Journal Title:** Drug Metabolism and Disposition

**Figure Legend:** Mass spectra and MS/MS fragmentation of AM2201  $\omega$ -1-OH metabolite. The mass spectra and proposed assignment for fragments observed in the MS2 spectra for the  $\omega$ -1-OH metabolite (Figure 1) of AM2201. The mass spectra for all other metabolites of JWH-018 have been published previously (Chimalakonda et al., 2011b; Moran et al., 2011).

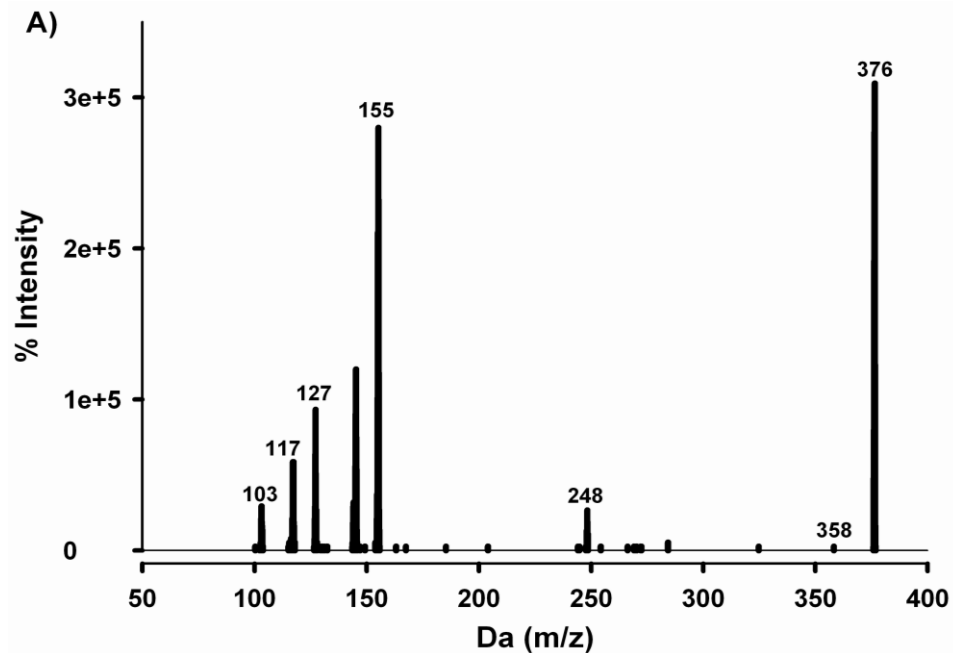

B)

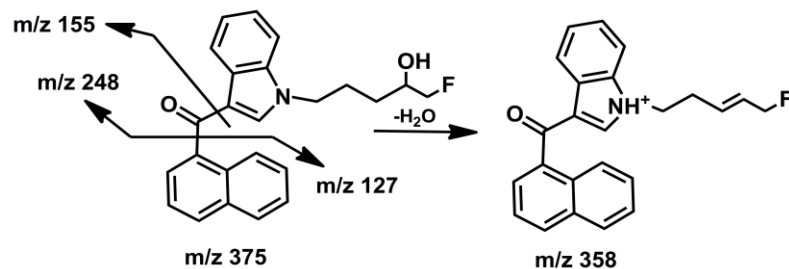

Supplement: supp_112.047530_Supplemental_Figure_1.pdf [file supp_112.047530_Supplemental_Figure_1.pdf]
