# Supplementary material
Source: PubMed Central journal article supplement (PMC3477201)

# Supplemental Figure 2

**Article Title:** Cytochrome P450-mediated oxidative metabolism of abused synthetic cannabinoids found in "K2/Spice": Identification of novel cannabinoid receptor ligands

**Authors:** Krishna C. Chimalakonda, Kathryn A. Seely, Stacie M. Bratton, Lisa K. Brents, Cindy L. Moran, Gregory W. Endres, Laura P. James, Paul F. Hollenberg, Paul L. Prather, Anna Radomska-Pandya, Jeffery H. Moran

**Journal Title:** Drug Metabolism and Disposition

**Figure Legend:** Oxidation of JWH-018 (panel A) and AM2201 (panel B) by human recombinant cytochrome P450s. Oxidation of JWH-018 (panel A) and AM2201 (panel B) to indole-ring and unidentified hydroxyl metabolites. Activity is normalized to hepatic abundance of specific P450s (Rowland-Yeo et al., 2003) and expressed as pmole product/min/mg protein.

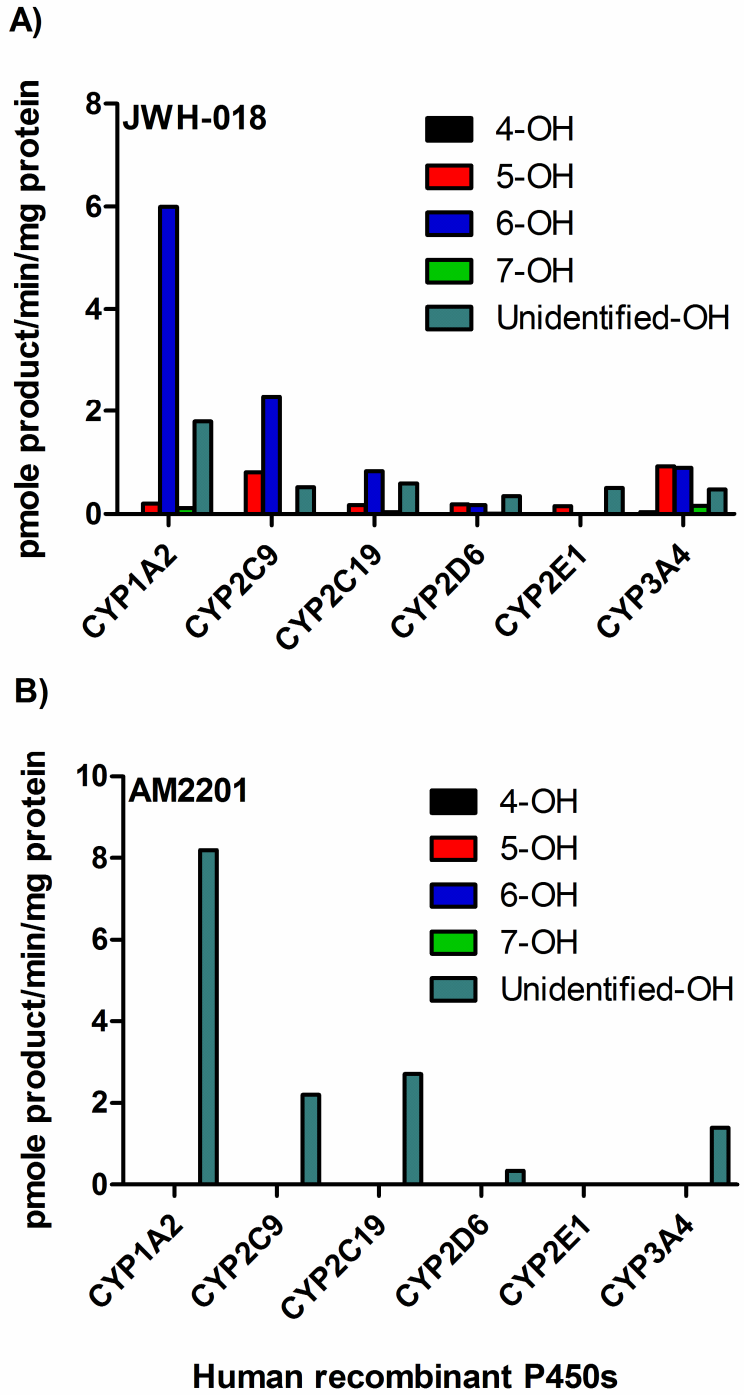

Supplement: supp_112.047530_Supplemental_Figure_2.pdf [file supp_112.047530_Supplemental_Figure_2.pdf]
