# Supplementary material
Source: PubMed Central journal article supplement (PMC3477201)

## Supplemental Figure 3

**Article Title:** Cytochrome P450-mediated oxidative metabolism of abused synthetic cannabinoids found in "K2/Spice": Identification of novel cannabinoid receptor ligands

**Authors:** Krishna C. Chimalakonda, Kathryn A. Seely, Stacie M. Bratton, Lisa K. Brents, Cindy L. Moran, Gregory W. Endres, Laura P. James, Paul F. Hollenberg, Paul L. Prather, **Anna Radomska-Pandya**, Jeffery H. Moran

**Journal Title:** Drug Metabolism and Disposition

**Figure legend:** Kinetic curves for metabolites of JWH-018 and AM2201 in pooled human liver microsomes. Kinetic curves for the formation of  $\omega$ -OH,  $\omega$ -1-OH,  $\omega$ -COOH metabolites of JWH-018 and  $\omega$ -1-OH metabolite of AM2201 after incubation of JWH-018 (panel A) and AM2201 (panel B) in pooled human liver microsomes as explained in *Materials and Methods*. The kinetic constants for curves shown here are presented in Tables 1 and 2.

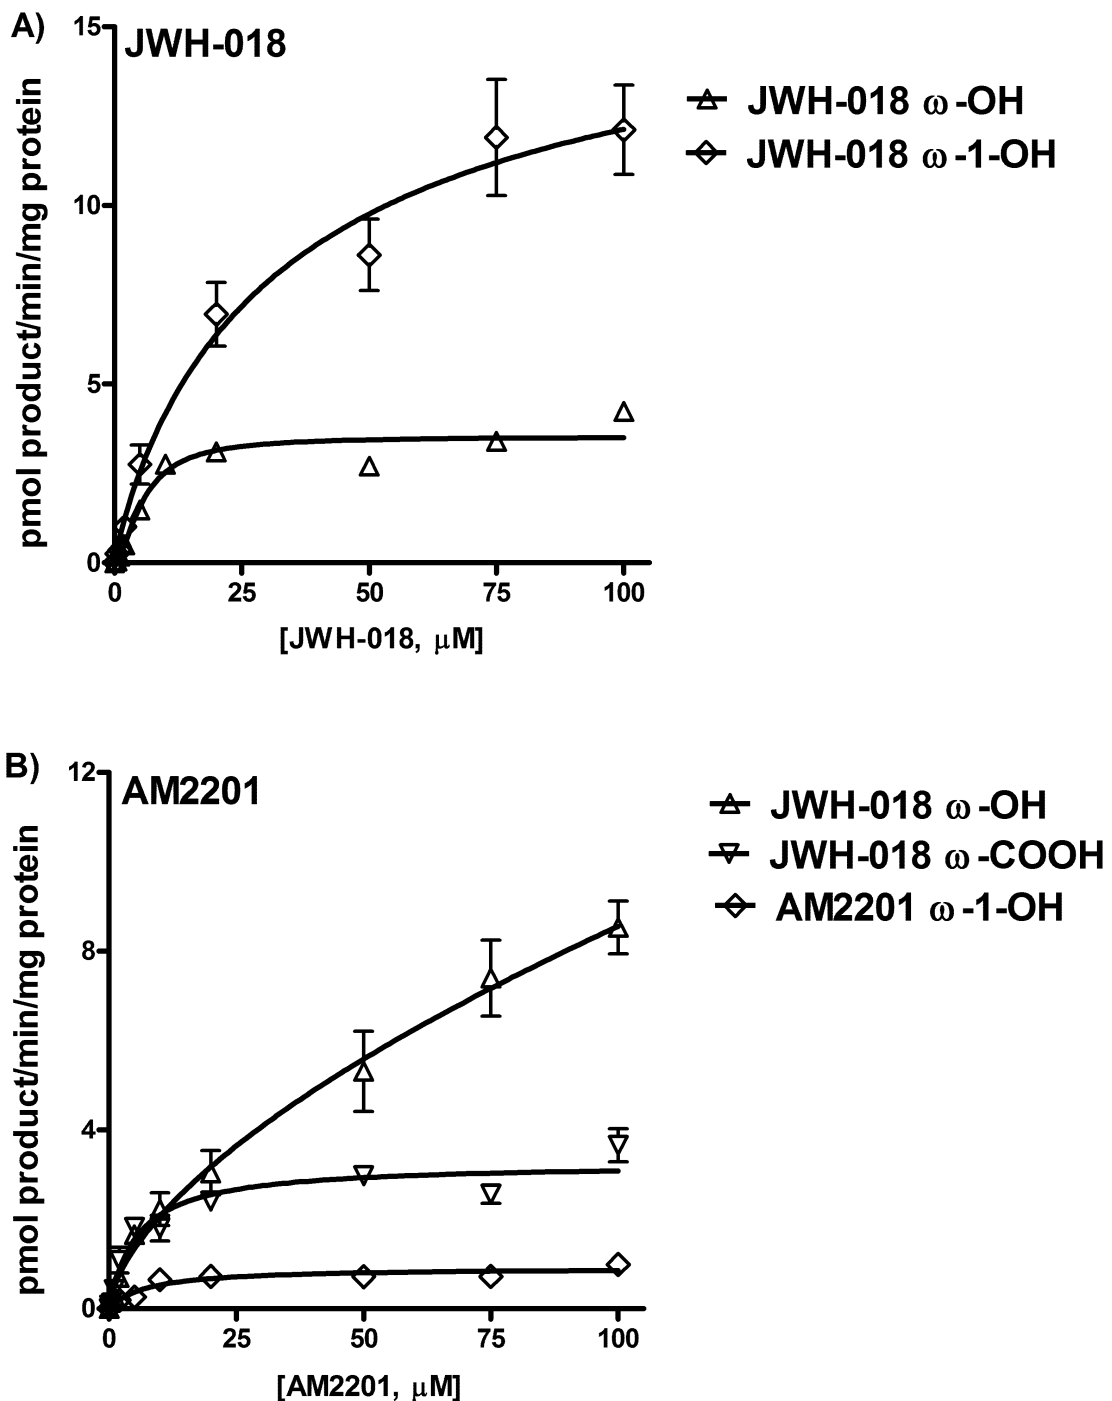

Supplement: supp_112.047530_Supplemental_Figure_3.pdf [file supp_112.047530_Supplemental_Figure_3.pdf]
