# Supplementary material
Source: PubMed Central journal article supplement (PMC3477201)

## Supplemental Figure 5

**Article Title:** Cytochrome P450-mediated oxidative metabolism of abused synthetic cannabinoids found in "K2/Spice": Identification of novel cannabinoid receptor ligands

**Authors:** Krishna C. Chimalakonda, Kathryn A. Seely, Stacie M. Bratton, Lisa K. Brents, Cindy L. Moran, Gregory W. Endres, Laura P. James, Paul F. Hollenberg, Paul L. Prather, Anna Radomska-Pandya, Jeffery H. Moran

**Journal Title:** Drug Metabolism and Disposition

**Figure Legend:** Kinetic curves for metabolites of AM2201 in cDNA expressed human recombinant P450s. Kinetic curves for the formation of  $\omega$ -OH,  $\omega$ -COOH, and  $\omega$ -1-OH metabolites after incubation of AM2201 with CYP1A2 (panel A), CYP2C9 (panel B), CYP2C19 (panel C), and CYP2D6 (panel D) as explained in *Materials and Methods*. The kinetic constants for curves shown here are presented in Table 2.

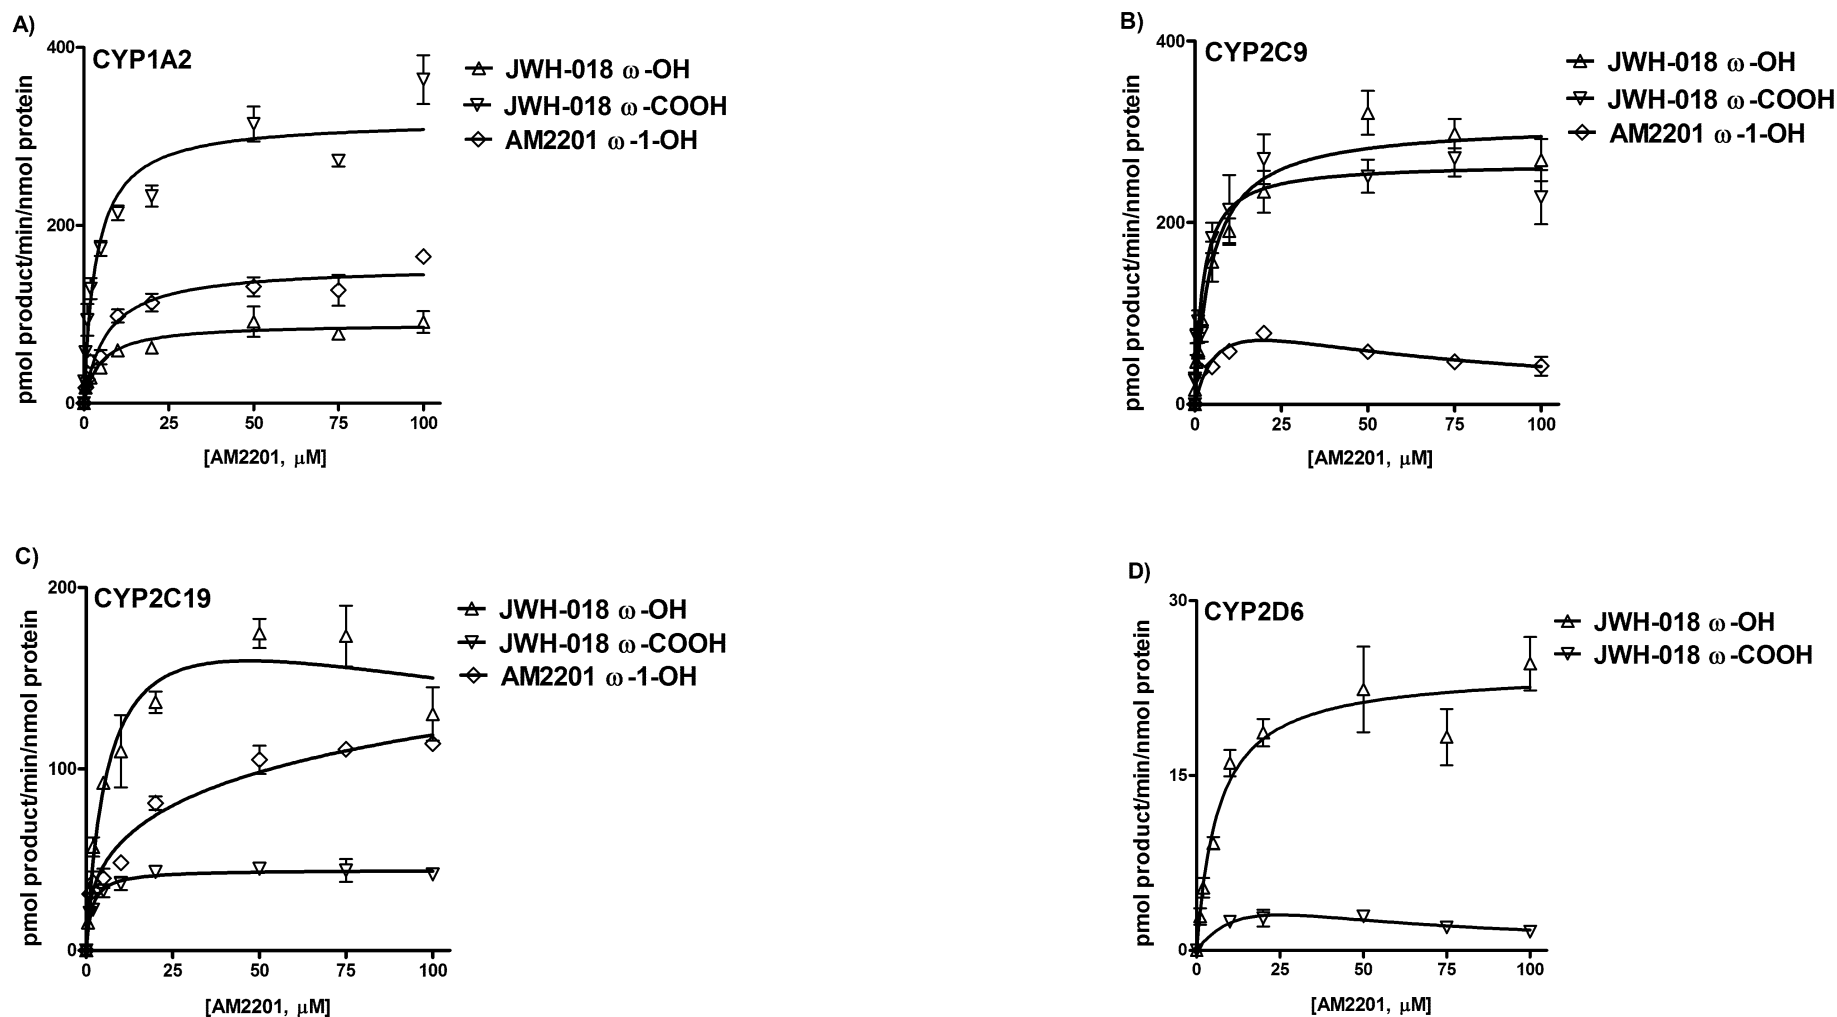

Supplement: supp_112.047530_Supplemental_Figure_5.pdf [file supp_112.047530_Supplemental_Figure_5.pdf]
