# Supplementary material
Source: PubMed Central journal article supplement (PMC3477201)

## Supplemental Figure 6

**Article Title:** Cytochrome P450-mediated oxidative metabolism of abused synthetic cannabinoids found in "K2/Spice": Identification of novel cannabinoid receptor ligands

**Authors:** Krishna C. Chimalakonda, Kathryn A. Seely, Stacie M. Bratton, Lisa K. Brents, Cindy L. Moran, Gregory W. Endres, Laura P. James, Paul F. Hollenberg, Paul L. Prather, Anna Radomska-Pandya, Jeffery H. Moran

**Journal Title:** Drug Metabolism and Disposition

**Figure Legend:** Kinetic curves for metabolites of JWH-018 and AM2201 in pooled human liver microsomes. Kinetic curves for the formation of 5- and 6-OH metabolites of JWH-018 and unidentified-OH metabolites of JWH-018 and AM2201 after incubation of JWH-018 (panel A) and AM2201 (panel B) in pooled human liver microsomes as explained in *Materials and Methods*. The kinetic constants for curves shown here are presented in Supplemental Table 2. The concentration used to determine reaction velocities of unidentified-OH metabolites of JWH-018 and AM2201 reported in Supplemental Tables 2-5 was estimated from standard responses obtained using JWH-018  $\omega$ -OH derivative

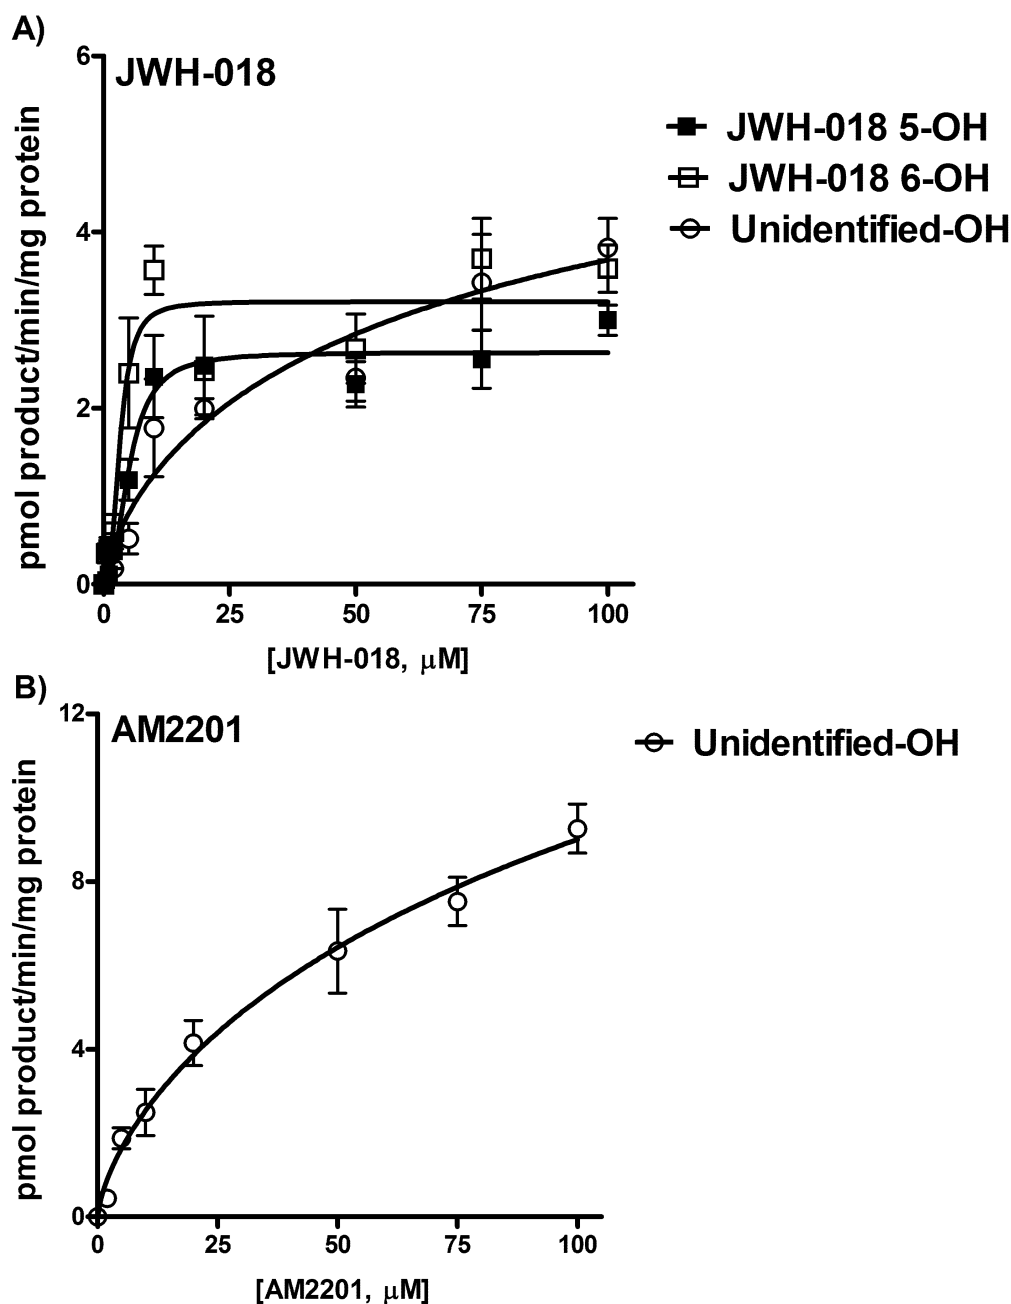

Supplement: supp_112.047530_Supplemental_Figure_6.pdf [file supp_112.047530_Supplemental_Figure_6.pdf]
