# Supplementary material
Source: PubMed Central journal article supplement (PMC3477201)
Supplement: supp_112.047530_Supplemental_Tables.pdf [file supp_112.047530_Supplemental_Tables.pdf]

**Article Title:** Cytochrome P450-mediated oxidative metabolism of abused synthetic cannabinoids found in “K2/Spice”: Identification of novel cannabinoid receptor ligands

**Authors:** Krishna C. Chimalakonda, Kathryn A. Seely, Stacie M. Bratton, Lisa K. Brents, Cindy L. Moran, Gregory W. Endres, Laura P. James, Paul F. Hollenberg, Paul L. Prather, Anna Radomska-Pandya, Jeffery H. Moran

**Journal Title:** Drug Metabolism and Disposition

**Supplemental Table 1.** MS/MS Experimental Conditions for Specific Reaction Monitoring

|         | Analyte       | Q1<br>(m/z)       | Q3<br>(m/z) | CE <sup>a</sup><br>(V) | EP <sup>b</sup><br>(V) | DP <sup>c</sup><br>(V) | CXP <sup>d</sup><br>(V) |
|---------|---------------|-------------------|-------------|------------------------|------------------------|------------------------|-------------------------|
| SRM     | 1, 3-7, and 9 | 358               | 155         | 37                     | 10                     | 86                     | 12                      |
|         | 8             | 372               | 155         | 37                     | 10                     | 86                     | 12                      |
|         | 2             | 360               | 155         | 37                     | 10                     | 86                     | 12                      |
|         | 10            | 376               | 155         | 37                     | 10                     | 86                     | 12                      |
| IDA-EPI | 1–10          | [MH] <sup>+</sup> | 80–600      | 40                     | 10                     | 40                     | NA                      |

<sup>a</sup>CE, Collision Energy; <sup>b</sup>EP, Entrance Potential; <sup>c</sup>DP, Declustering Potential; <sup>d</sup>CXP, Collision

Cell Exit Potential, NA, Not applicable

**Article Title:** Cytochrome P450-mediated oxidative metabolism of abused synthetic cannabinoids found in “K2/Spice”: Identification of novel cannabinoid receptor ligands

**Authors:** Krishna C. Chimalakonda, Kathryn A. Seely, Stacie M. Bratton, Lisa K. Brents, Cindy L. Moran, Gregory W. Endres, Laura P. James, Paul F. Hollenberg, Paul L. Prather, Anna Radomska-Pandya, Jeffery H. Moran

**Journal Title:** Drug Metabolism and Disposition

**Supplemental Table 2. Kinetic parameters for JWH-018 oxidation.** “ $K_m$ ” and “ $V_{max}$ ” values are given in  $\mu\text{M}$  and pmole/min/nmole protein for recombinant P450 isoforms and pmole/min/mg protein for HLM, respectively.

| JWH-018 Metabolites |             | JWH-018 5-OH    | JWH-018 6-OH    | JWH-018 7-OH   | JWH-018 Unidentified-OH |
|---------------------|-------------|-----------------|-----------------|----------------|-------------------------|
| <b>CYP1A2</b>       | $V_{max}$   | ND              | $2696 \pm 72$   | ND             | $436 \pm 16$            |
|                     | $K_m$       | ND              | $7.2 \pm 0.87$  | ND             | $5.0 \pm 0.83$          |
|                     | Kinetic Fit | ND              | M-M             | ND             | M-M                     |
| <b>CYP2C9</b>       | $V_{max}$   | $60 \pm 2.2$    | $207 \pm 6$     | ND             | ND                      |
|                     | $K_m$       | $2.3 \pm 0.31$  | $2.5 \pm 0.27$  | ND             | ND                      |
|                     | Kinetic Fit | Hill, n= 1.6    | Hill, n= 1.3    | ND             | ND                      |
| <b>CYP2C19</b>      | $V_{max}$   | ND              | 5035            | ND             | 431                     |
|                     | $K_m$       | ND              | 297             | ND             | 85                      |
|                     | Kinetic Fit | ND              | *               | ND             | *                       |
| <b>CYP2D6</b>       | $V_{max}$   | $13 \pm 0.56$   | $16.6 \pm 0.82$ | $2.6 \pm 0.17$ | ND                      |
|                     | $K_m$       | $0.59 \pm 0.16$ | $2.9 \pm 0.7$   | $3.0 \pm 0.98$ | ND                      |
|                     | Kinetic Fit | M-M             | M-M             | M-M            | ND                      |
| <b>HLM</b>          | $V_{max}$   | $2.6 \pm 0.15$  | $3.2 \pm 0.18$  | ND             | $4.5 \pm 0.6$           |
|                     | $K_m$       | $5.0 \pm 0.82$  | $3.2 \pm 0.58$  | ND             | $25.4 \pm 9.0$          |
|                     | Kinetic Fit | Hill, n= 2.3    | Hill, n= 2.7    | ND             | M-M                     |

**Article Title:** Cytochrome P450-mediated oxidative metabolism of abused synthetic cannabinoids found in “K2/Spice”: Identification of novel cannabinoid receptor ligands

**Authors:** Krishna C. Chimalakonda, Kathryn A. Seely, Stacie M. Bratton, Lisa K. Brents, Cindy L. Moran, Gregory W. Endres, Laura P. James, Paul F. Hollenberg, Paul L. Prather, Anna Radomska-Pandya, Jeffery H. Moran

**Journal Title:** Drug Metabolism and Disposition

**Supplemental Table 3. Kinetic parameters for AM2201 oxidation.** “K<sub>m</sub>” and “V<sub>max</sub>” values are given in μM and pmole/min/nmole protein for recombinant P450 isoforms and pmole/min/mg protein for HLM, respectively

| AM2201 Metabolites |                  | AM2201 Unidentified-1 OH    | AM2201 Unidentified-2 OH |
|--------------------|------------------|-----------------------------|--------------------------|
| <b>CYP1A2</b>      | V <sub>max</sub> | 906 ± 40                    | ND                       |
|                    | K <sub>m</sub>   | 7.3 ± 1.3                   | ND                       |
|                    | Kinetic Fit      | M-M                         | ND                       |
| <b>CYP2C9</b>      | V <sub>max</sub> | 128 ± 8.3                   | ND                       |
|                    | K <sub>m</sub>   | 1.5 ± 0.97                  | ND                       |
|                    | Kinetic Fit      | M-M                         | ND                       |
| <b>CYP2C19</b>     | V <sub>max</sub> | 732 ± 30                    | ND                       |
|                    | K <sub>m</sub>   | 4.2 ± 0.8                   | ND                       |
|                    | Kinetic Fit      | M-M                         | ND                       |
| <b>CYP2D6</b>      | V <sub>max</sub> | 131 ± 3.4                   | 11.6 ± 0.6               |
|                    | K <sub>m</sub>   | 3.0 ± 0.4                   | 1.8 ± 0.6                |
|                    | Kinetic Fit      | M-M                         | M-M                      |
| <b>HLM</b>         | V <sub>max</sub> | 26                          | ND                       |
|                    | K <sub>m</sub>   | 255                         | ND                       |
|                    | Kinetic Fit      | Hill, n = 0.69 <sup>#</sup> | ND                       |

**Article Title:** Cytochrome P450-mediated oxidative metabolism of abused synthetic cannabinoids found in “K2/Spice”: Identification of novel cannabinoid receptor ligands

**Authors:** Krishna C. Chimalakonda, Kathryn A. Seely, Stacie M. Bratton, Lisa K. Brents, Cindy L. Moran, Gregory W. Endres, Laura P. James, Paul F. Hollenberg, Paul L. Prather, Anna Radomska-Pandya, Jeffery H. Moran

**Journal Title:** Drug Metabolism and Disposition

**Supplemental Table 4. Fractional contribution ( $f_{m, CYP}$ ) of recombinant human P450 (rCYP) isoforms during JWH-018 oxidation.** Intrinsic clearance ( $CL_{int}$ ) values are given in  $\mu\text{L}/\text{min}/\text{nmole}$  P450 and hepatic abundance values of specific P450s (Proctor et al., 2004; Rowland-Yeo et al., 2003) are given in nmoles/mg protein, respectively.

| JWH-018 Metabolites |                 | $CL_{int}$<br>in rCYP | Hepatic<br>Abundance | Fractional Contribution of each<br>P450 ( $f_{m, CYP}$ ) |
|---------------------|-----------------|-----------------------|----------------------|----------------------------------------------------------|
| <b>CYP1A2</b>       | 5-OH            | 0                     | 0.045-0.052          | 0                                                        |
|                     | 6-OH            | 374                   |                      | 0.75-0.85                                                |
|                     | 7- OH           | 0                     |                      | 0                                                        |
|                     | Unidentified-OH | 87.2                  |                      | 0.98-0.99                                                |
| <b>CYP2C9</b>       | 5-OH            | 26.1                  | 0.032-0.073          | 0.81-0.92                                                |
|                     | 6-OH            | 83                    |                      | 0.14-0.24                                                |
|                     | 7- OH           | 0                     |                      | 0                                                        |
|                     | Unidentified-OH | 0                     |                      | 0                                                        |
| <b>CYP2C19</b>      | 5-OH            | 0                     | 0.006-0.014          | 0                                                        |
|                     | 6-OH            | 17                    |                      | 0.013                                                    |
|                     | 7- OH           | 0                     |                      | 0                                                        |
|                     | Unidentified-OH | 5.1                   |                      | 0.024                                                    |
| <b>CYP2D6</b>       | 5-OH            | 22                    | 0.009-0.01           | 0.081                                                    |
|                     | 6-OH            | 5.7                   |                      | 0.002                                                    |
|                     | 7-OH            | 0.870                 |                      | 1                                                        |
|                     | Unidentified-OH | 0                     |                      | 0                                                        |



**Article Title:** Cytochrome P450-mediated oxidative metabolism of abused synthetic cannabinoids found in “K2/Spice”: Identification of novel cannabinoid receptor ligands

**Authors:** Krishna C. Chimalakonda, Kathryn A. Seely, Stacie M. Bratton, Lisa K. Brents, Cindy L. Moran, Gregory W. Endres, Laura P. James, Paul F. Hollenberg, Paul L. Prather, Anna Radomska-Pandya, Jeffery H. Moran

**Journal Title:** Drug Metabolism and Disposition

**Supplemental Table 5. Fractional contribution ( $f_{m, CYP}$ ) of recombinant human P450 (rCYP) isoforms during AM2201 oxidation.** Intrinsic clearance ( $CL_{int}$ ) values are given in  $\mu\text{L}/\text{min}/\text{nmole}$  P450 and hepatic abundance values of specific P450s (Proctor et al., 2004; Rowland-Yeo et al., 2003) are given in nmoles/mg protein, respectively.

| AM2201 metabolites |                   | $CL_{int}$ in rCYP | Hepatic Abundance | Fractional Contribution of each P450 ( $f_{m, CYP}$ ) |
|--------------------|-------------------|--------------------|-------------------|-------------------------------------------------------|
| <b>CYP1A2</b>      | Unidentified-OH-1 | 124                |                   | 0.42-0.56                                             |
|                    | Unidentified-OH-2 | 0                  | 0.045-0.052       | 0                                                     |
| <b>CYP2C9</b>      | Unidentified-OH-1 | 85                 |                   | 0.29-0.40                                             |
|                    | Unidentified-OH-2 | 0                  | 0.032-0.073       | 0                                                     |
| <b>CYP2C19</b>     | Unidentified-OH-1 | 174                |                   | 0.19                                                  |
|                    | Unidentified-OH-2 | 0                  | 0.006-0.014       | 0                                                     |
| <b>CYP2D6</b>      | Unidentified-OH-1 | 44                 |                   | 0.025                                                 |
|                    | Unidentified-OH-2 | 6.4                | 0.009-0.01        | 1                                                     |
